# Supplementary material for: Transcriptomic characterization of human lateral septum neurons reveals conserved and divergent marker genes across species
Source: PubMed Central journal article supplement — bioRxiv. 2024 Sep 22:2024.04.22.590602. Originally published 2024 Apr 26. Preprint. [Version 2] doi: 10.1101/2024.04.22.590602 (PMC11071425; doi:10.1101/2024.04.22.590602), 2024-09-22
Supplement: media-2.pdf [file media-2.pdf]

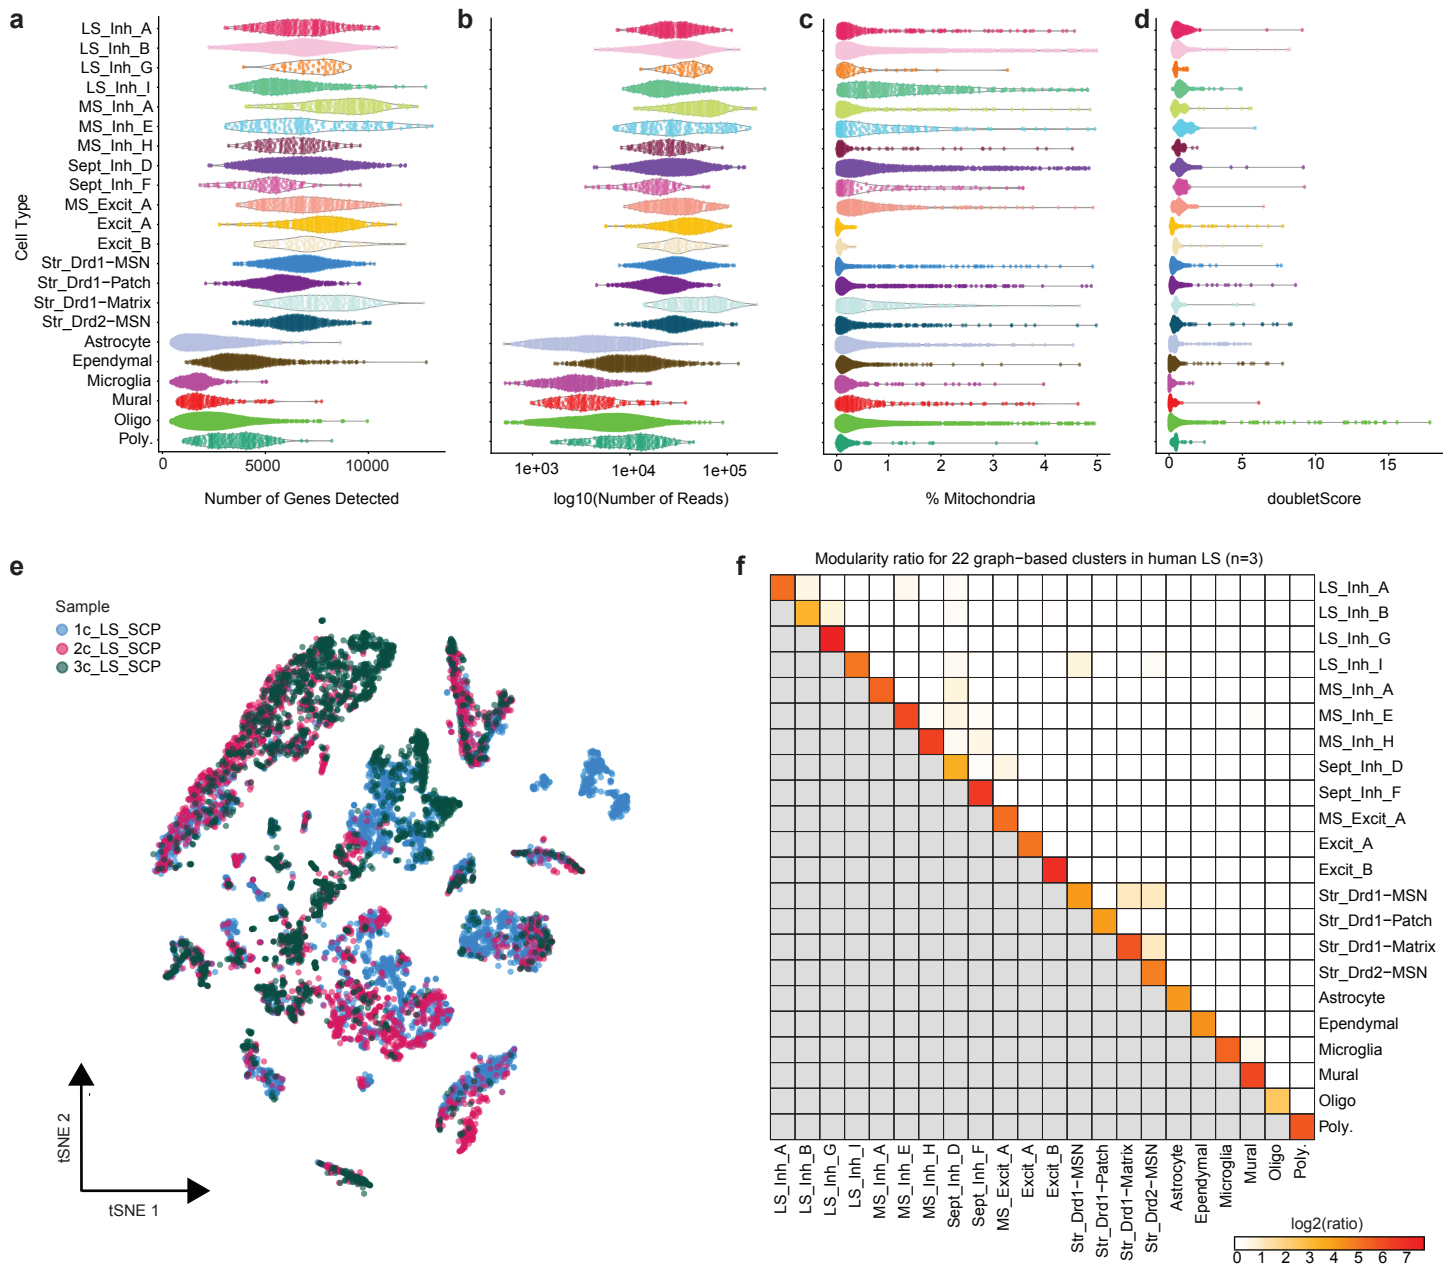

**Figure S2.** Cluster and nuclei quality control. Violin plots of various quality control metrics such as **a**, number of genes detected **b**, number of reads **c**, percent of reads mapping to the mitochondrial genome and **d**, doublet score. **e**, t-SNE with nuclei colored by donor/sample. **f**, Heatmap of pairwise modularity scores for 22 clusters from human LS single nucleus RNA-sequencing.
