# Supplementary material for: Transcriptomic characterization of human lateral septum neurons reveals conserved and divergent marker genes across species
Source: PubMed Central journal article supplement — bioRxiv. 2024 Sep 22:2024.04.22.590602. Originally published 2024 Apr 26. Preprint. [Version 2] doi: 10.1101/2024.04.22.590602 (PMC11071425; doi:10.1101/2024.04.22.590602), 2024-09-22
Supplement: media-3.pdf [file media-3.pdf]

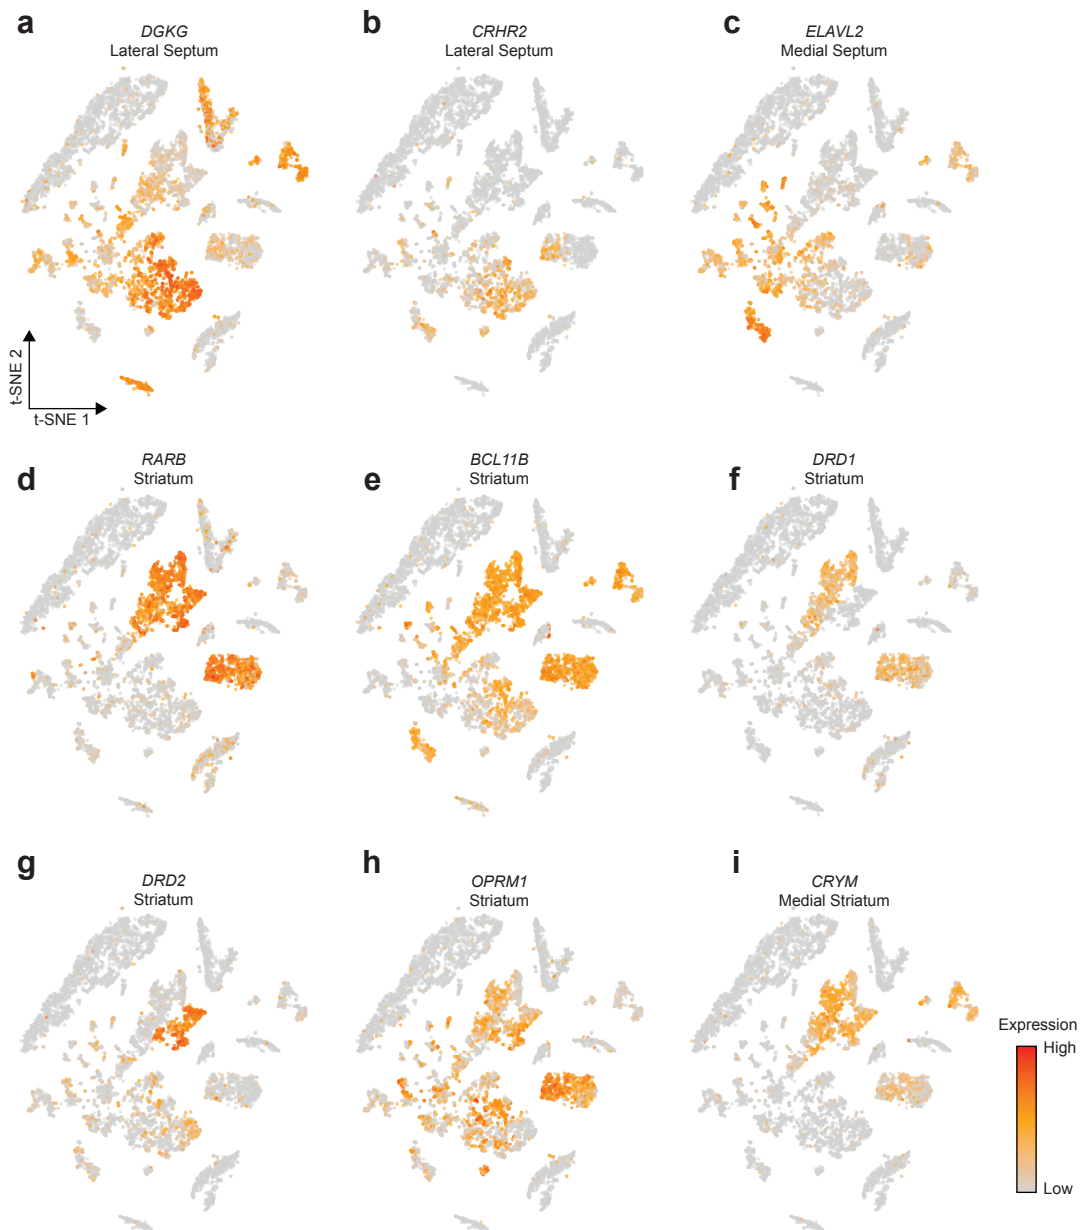

**Figure S3.** Distribution of expression of septal and striatal marker genes. Feature plots for **a**, *DGKG*, **b**, *CRHR2*, **c**, *ELAVL2*, **d**, *RARB*, **e**, *BCL11B*, **f**, *DRD1*, **g**, *DRD2*, **h**, *OPRM1*, **i**, *CRYM*. Titles include gene name and brain region where gene is most highly expressed.
