# Supplementary material for: Transcriptomic characterization of human lateral septum neurons reveals conserved and divergent marker genes across species
Source: PubMed Central journal article supplement — bioRxiv. 2024 Sep 22:2024.04.22.590602. Originally published 2024 Apr 26. Preprint. [Version 2] doi: 10.1101/2024.04.22.590602 (PMC11071425; doi:10.1101/2024.04.22.590602), 2024-09-22
Supplement: media-4.pdf [file media-4.pdf]

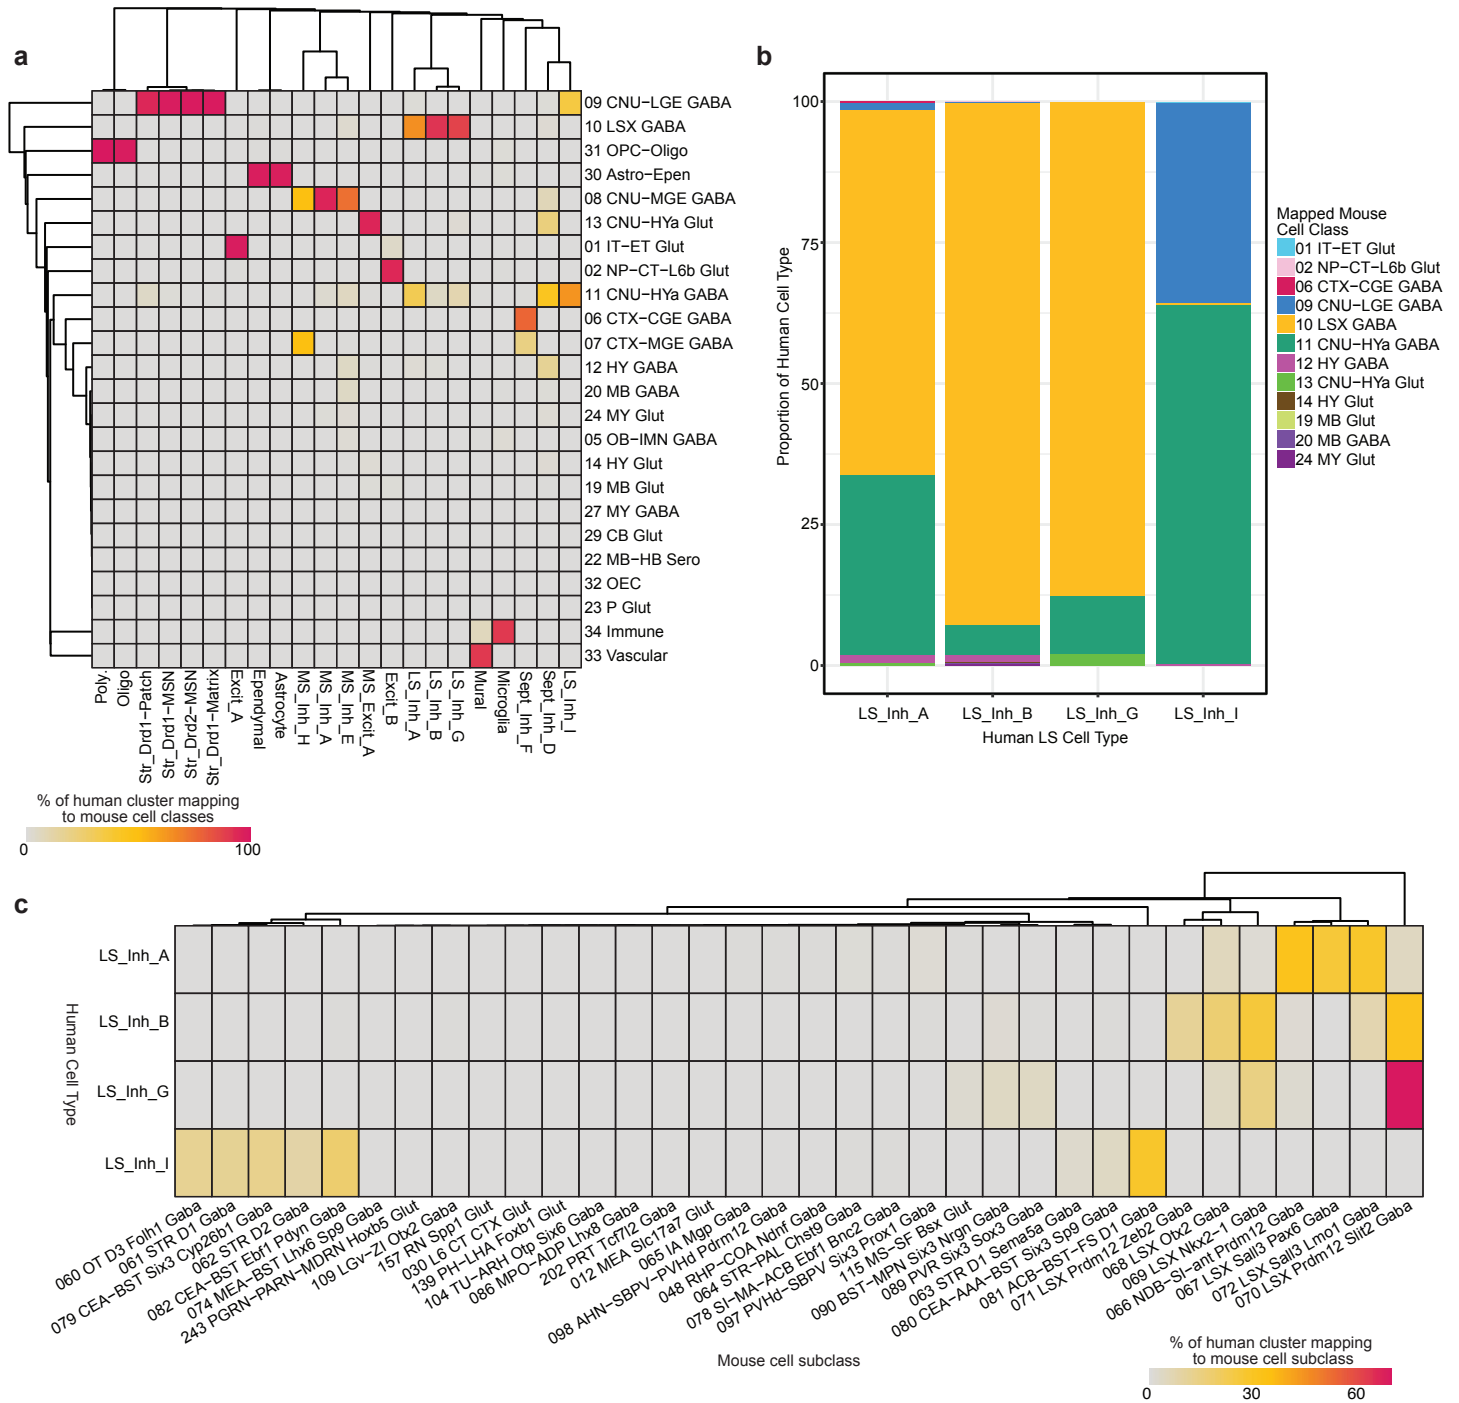

**Figure S4.** Cross-species analysis with MapMyCells. **a**, Heatmap of the percentage of each human cell cluster mapping to broad mouse cell classes. **b**, Barplot for the proportion of each human LS neuronal cell type mapping to broad mouse cell classes. **c**, Heatmap of the percentage of each human LS neuronal cell type mapping to mouse subclasses.
